# Supplementary material for: Self-formed asymmetric Schottky contacts between graphene and WSiGeN4
Source: Royal Society of Chemistry journal article supplement (doi:10.1039/d4cp02099e), 2024-01-01
Supplement: d4cp02099e1.pdf [file d4cp02099e1.pdf]

## Supporting Information

### Self-formed asymmetric Schottky contacts between graphene and WSiGeN<sub>4</sub>

Dingbo Zhang<sup>a,b</sup>, Fengai Zhao<sup>b</sup>, Hongyan Wang<sup>a,b</sup>, Yuxiang Ni<sup>a,b</sup>\*

<sup>a</sup> Key Laboratory of Advanced Technologies of Materials, Ministry of Education of China, Southwest Jiaotong University, 610031 Chengdu, China

<sup>b</sup> School of Physical Science and Technology, Southwest Jiaotong University, 610031 Chengdu, China

Corresponding Author

\* E-mail: yuxiang.ni@swjtu.edu.cn

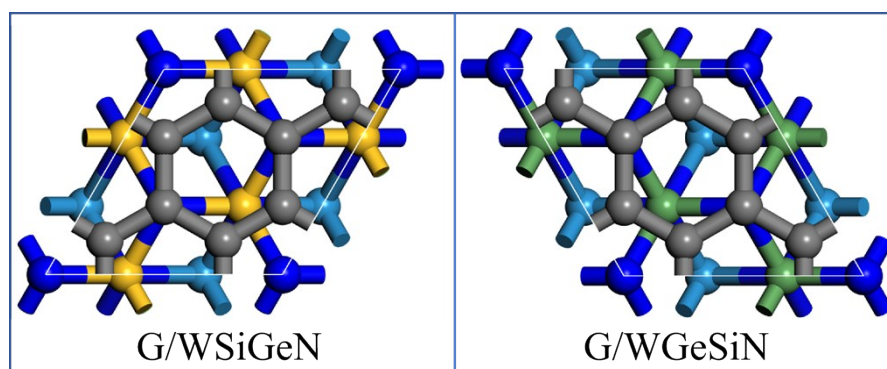

Figure S1. Top view of G/WSiGeN and G/WGeSiN heterostructures.

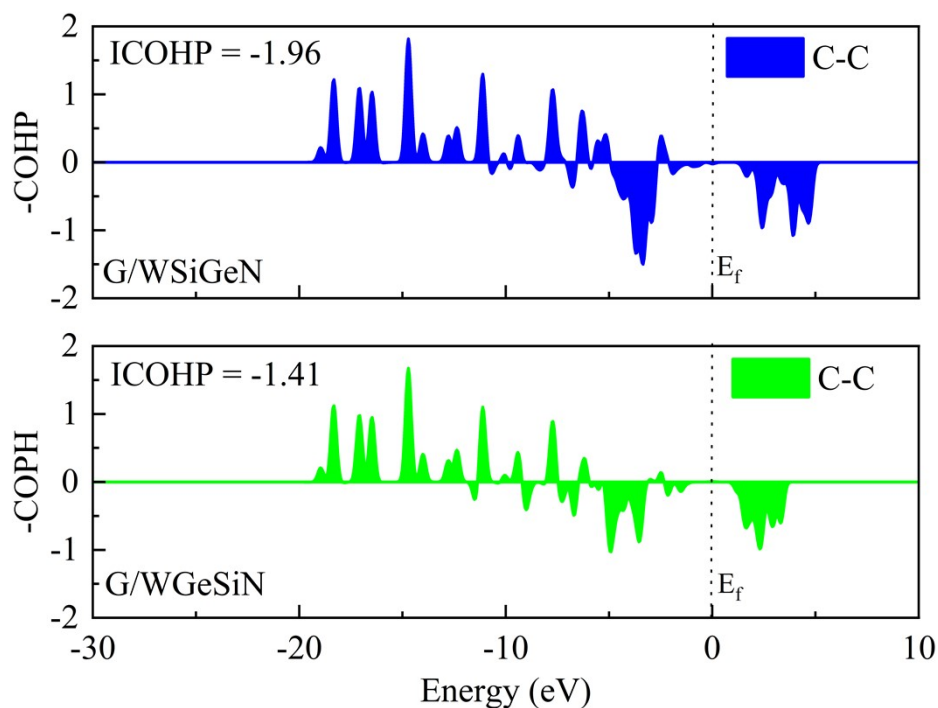

Figure S2. COHP between C atoms of G/WSiGeN and G/WGeSiN heterostructures.

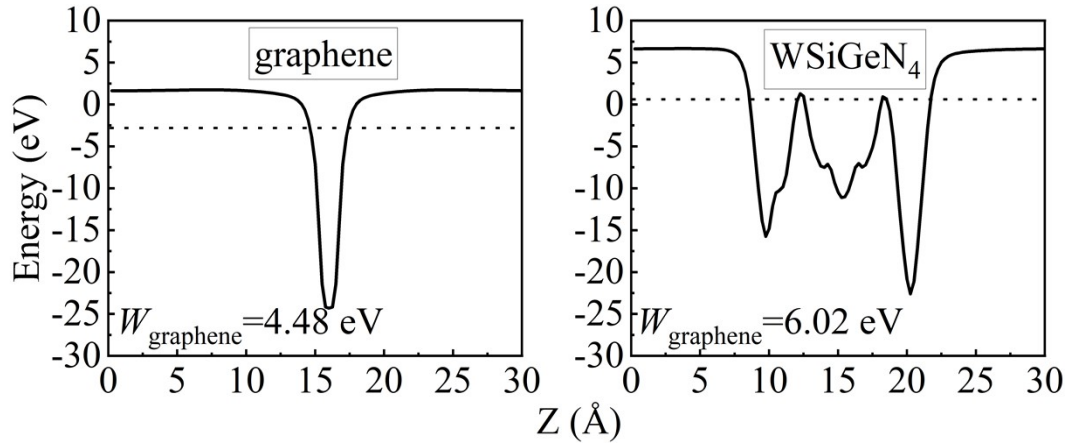

Figure S3. The electrostatic potentials and work functions of graphene and WSiGeN<sub>4</sub>.

The work function The work function is defined as follows:

$$\Phi = E_{vac.} - E_F$$

where  $E_{vac.}$  is the energy level of a stationary electron in the vacuum,  $E_F$  represents the Fermi level of the corresponding systems. Based on the formula, the work functions of graphene and WSiGeN<sub>4</sub> are 4.48 and 6.02 eV, respectively, as shown in Figure S3, implying that the electron transfer form graphene to WSiGeN<sub>4</sub>.
